# Supplementary material for: Casual effect of ulcerative colitis on chronic heart failure: results from a bidirectional Mendelian randomization study
Source: Springer Nature journal article supplement (doi:10.1186/s12876-025-03671-y), 2025-02-20
Supplement: MOESM1 [file 12876_2025_3671_MOESM1_ESM.pdf]

This document certifies that the manuscript

Casual Effect of Ulcerative Colitis to Chronic Heart Failure, Results from Bidirectional Mendelian Randomization Study

prepared by the authors

Yuzhou Chu

was edited for proper English language, grammar, punctuation, spelling, and overall style by one or more of the highly qualified English speaking editors at SNAS.

This certificate was issued on **December 5, 2024** and may be verified on the [SNAS website](#) using the verification code **D971-315E-BF09-D579-D9A5**.

Neither the research content nor the authors' intentions were altered in any way during the editing process. Documents receiving this certification should be English-ready for publication; however, the author has the ability to accept or reject our suggestions and changes. To verify the final

SNAS edited version, please visit our verification page at [secure.authorservices.springernature.com/certificate/verify](https://secure.authorservices.springernature.com/certificate/verify).

If you have any questions or concerns about this edited document, please contact SNAS at [support@as.springernature.com](mailto:support@as.springernature.com).
